## Specification of dopaminergic subsets involves interplay of En1 and Pitx3

**Jesse V. Veenliet, Maria T. M. Alves dos Santos, Willemieke M. Kouwenhoven, Lars von Oerthel, Jamie L. Lim, Annemarie J. A. van der Linden, Marian J. A. Groot Koerkamp, Frank C. P. Holstege and Marten P. Smidt**

There was an error published in *Development* **140**, 3373-3384.

On p. 3374, a section of the microarray analysis text should read as follows:

Analysis was performed as described (Roepman et al., 2005). Data were analyzed using ANOVA (R version 2.2.1/MAANOVA version 0.98-7) (Wu et al., 2003). Genes with  $P < 0.05$  after false discovery rate correction were considered to be significantly changed. Mouse Whole Genome Gene Expression Microarrays V1 (Agilent Technologies, Belgium) containing mouse 60-mer probes were used and data have been deposited in ArrayExpress under accession number E-TABM-1104.

The authors apologise to readers for this mistake.
